# Supplementary material
Source: Springer Nature journal article supplement (https://www.springermedizin.de/resource/supplementary/12916_2012_757_MOESM3_ESM.pdf/9598234)

Overall indirect effect via mediators 0.26 (0.11),  $P=.021$

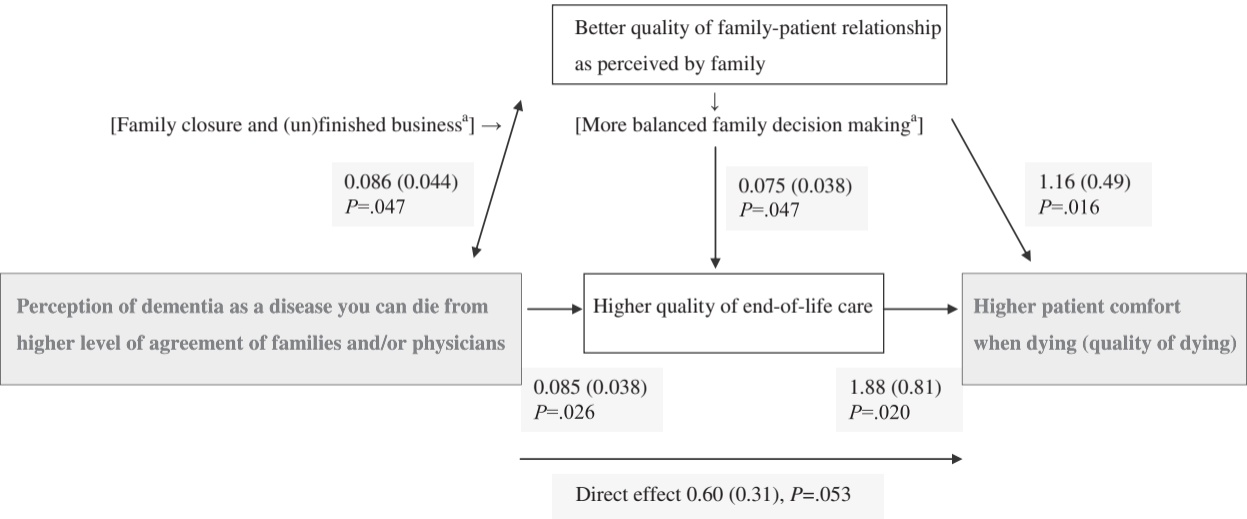

Supplement: MOESM3 [file 9598234]
